# Supplementary material for: Unravelling the mechanism of temperature modulated exciton binding energy for MAPbBr3 perovskites
Source: Royal Society of Chemistry journal article supplement (doi:10.1039/d4cp01681e), 2024-01-01
Supplement: d4cp01681e1.pdf [file d4cp01681e1.pdf]

## Supplementary Information

### Unravel the mechanism of temperature modulated exciton binding energy for MAPbBr<sub>3</sub> perovskites

Yanzhuo Hu,<sup>ab</sup> Dong Liu,<sup>\*ab</sup> Ying-Bo Lu,<sup>\*ab</sup> Hao Wang,<sup>c</sup> Zhongchen Wu,<sup>ab</sup> Hexin  
Bao,<sup>b</sup> Ruijie Zou,<sup>d</sup> Xianyuan Jiang,<sup>e</sup> Wei-Yan Cong<sup>b</sup> and Chengbo Guan<sup>b</sup>

<sup>a</sup> Shandong Key Laboratory of Optical Astronomy and Solar-Terrestrial Environment,  
Institute of Space Sciences, Shandong University, Weihai 264209, China.

<sup>b</sup> School of Space Science and Physics, Shandong University, Weihai 264209, China.

<sup>c</sup> State Key Laboratory of High Field Laser Physics and CAS Center for Excellence in  
Ultra-Intense Laser Science, Shanghai Institute of Optics and Fine Mechanics, Chinese  
Academy of Sciences, Shanghai 201800, China.

<sup>d</sup> School of Mathematics, Nanjing University of Aeronautics and Astronautics,  
Nanjing, Jiangsu, 211106, China.

<sup>e</sup> School of Physical Science and Technology, ShanghaiTech University, Shanghai  
201210, China.

\* Corresponding Author. Email: [lyb@sdu.edu.cn](mailto:lyb@sdu.edu.cn); [shendongliu@126.com](mailto:shendongliu@126.com)

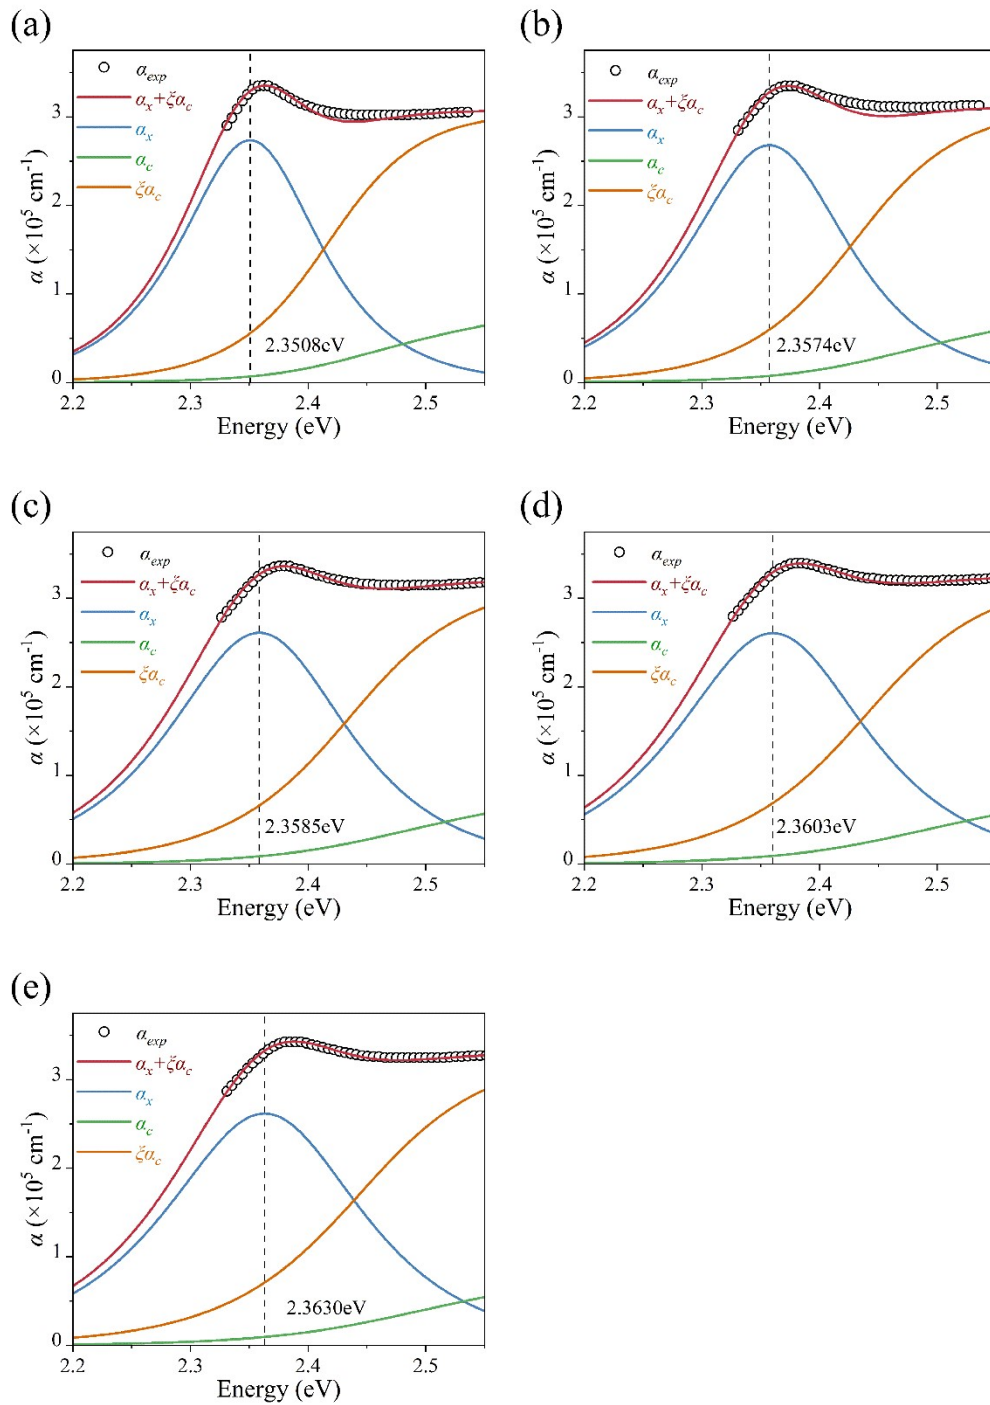

**Fig. S1.** (a)-(e) are Elliott model fitted absorption spectra of MAPbBr<sub>3</sub> in 170 K, 210 K, 230 K, 250 K and 270 K, respectively. The scatter plot represents experimentally obtained absorption coefficients, while the red line depicts absorption coefficients fitted based on the Elliott model. The blue, green, and orange lines represent excitonic absorption, continuum state absorption, and continuum state absorption enhanced by the Sommerfeld factor within the Elliott model, respectively.

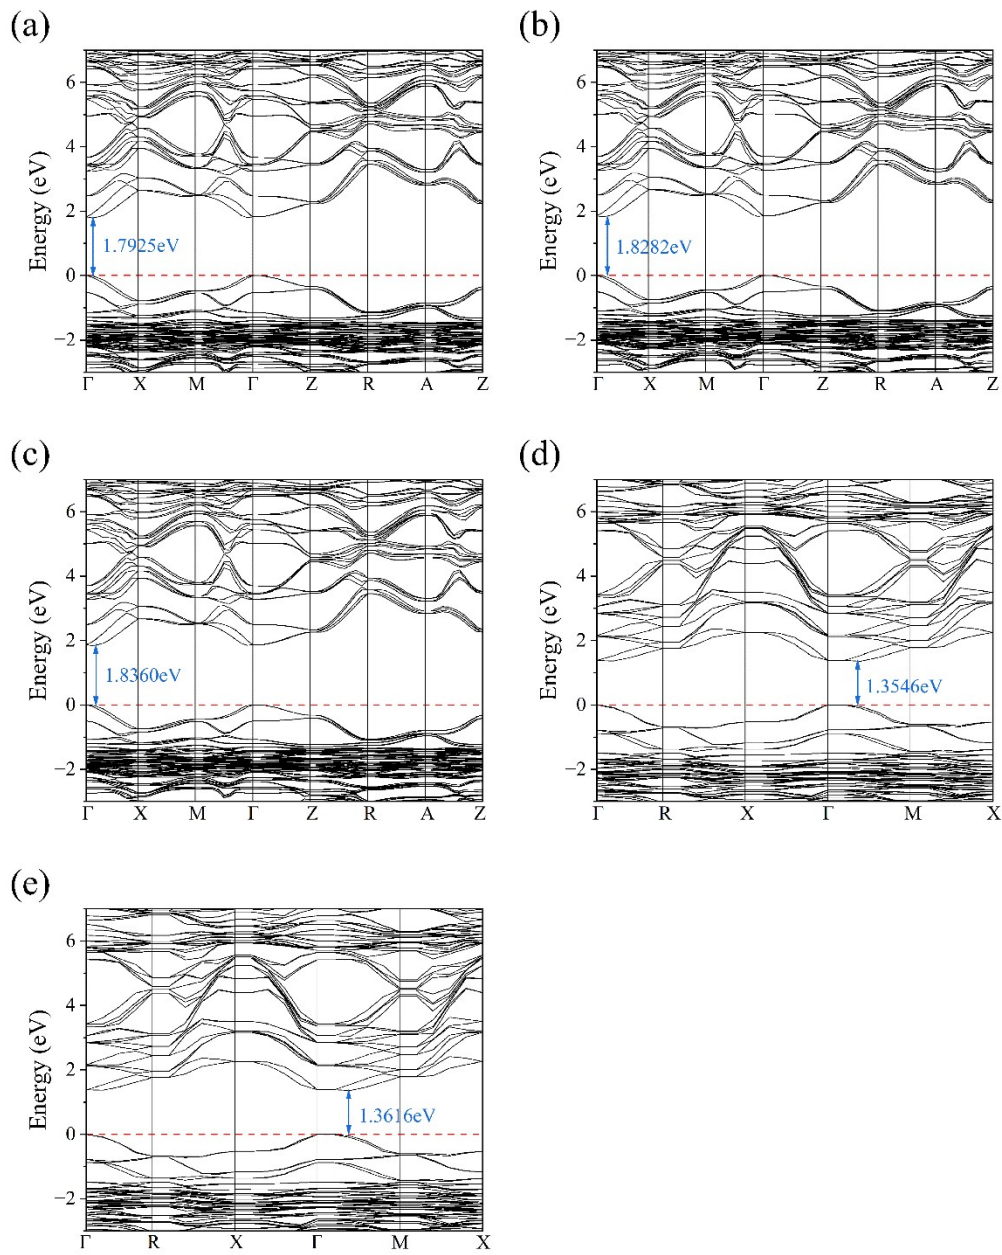

**Fig. S2.** (a)-(e) are the band structures of MAPbBr<sub>3</sub> in 170 K, 210 K, 230 K, 250 K and 270 K, respectively.

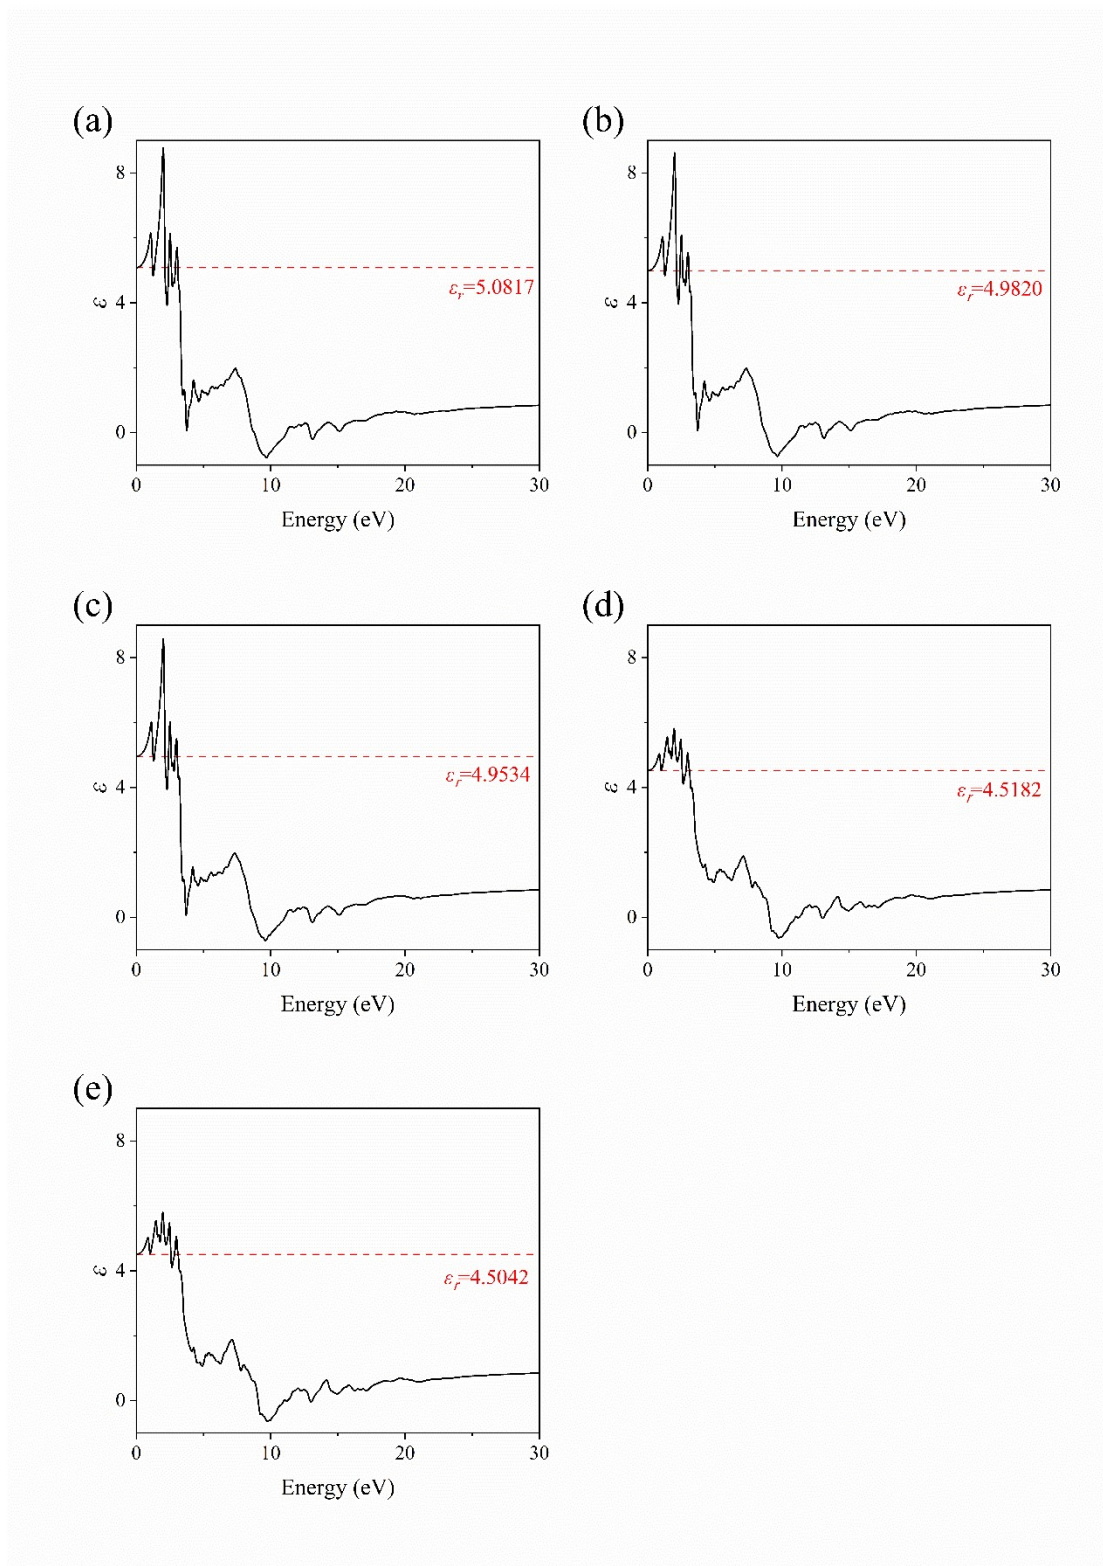

**Fig. S3.** (a)-(e) are the real part of the dielectric functions of MAPbBr<sub>3</sub> in 170 K, 210 K, 230 K, 250 K and 270 K, respectively. The red dashed lines indicate the relative permittivity.

**Table S1: Lattice constants and volumes of MAPbBr<sub>3</sub> from 170 K to 290 K with 20 K interval.**

| T(K) | a(Å)    | b(Å)    | c(Å)    | V(Å <sup>3</sup> ) |
|------|---------|---------|---------|--------------------|
| 170  | 8.3996  | 8.4312  | 11.8299 | 837.322            |
| 190  | 8.4201  | 8.4518  | 11.8589 | 843.484            |
| 210  | 8.4407  | 8.4724  | 11.8878 | 849.674            |
| 230  | 8.4613  | 8.4931  | 11.9167 | 855.900            |
| 250  | 11.9091 | 11.8343 | 6.0433  | 851.491            |
| 270  | 11.9173 | 11.8424 | 6.0475  | 853.253            |
| 290  | 11.9255 | 11.8506 | 6.0516  | 855.017            |
